# Supplementary material
Source: bioRxiv or medRxiv preprint supplement (https://medrxiv.org/highwire/filestream/77330/field_highwire_adjunct_files/0/2020.04.17.20064907-1.pdf)
Supplement: Supplementary file [file 2020.04.17.20064907-1.pdf]

**Supplementary table 1.** Information of the 87 RT-qPCR confirmed COVID-19 patients.

| <b>Patients No.</b> | <b>Disease severity</b> | <b>Underlying disease</b> |
|---------------------|-------------------------|---------------------------|
| 1                   | High severe             | 1, 2, 3                   |
| 2                   | High severe             | 4, 5, 6                   |
| 3                   | High severe             | 7, 4, 8, 9                |
| 4                   | High severe             | 10, 11                    |
| 5                   | High severe             | 5, 12                     |
| 6                   | Severe                  | 4                         |
| 7                   | Severe                  | none                      |
| 8                   | Severe                  | none                      |
| 9                   | Severe                  | 4                         |
| 10                  | Severe                  | none                      |
| 11                  | Severe                  | none                      |
| 12                  | Severe                  | 4, 13                     |
| 13                  | Severe                  | 1                         |
| 14                  | Severe                  | none                      |
| 15                  | Severe                  | none                      |
| 16                  | Severe                  | 4, 7, 10, 14, 15          |
| 17                  | Severe                  | 4                         |
| 18                  | Severe                  | 4                         |
| 19                  | Severe                  | 4, 10, 16                 |
| 20                  | Severe                  | none                      |
| 21                  | Severe                  | none                      |
| 22                  | Severe                  | 17                        |
| 23                  | Moderate                | none                      |
| 24                  | Moderate                | none                      |
| 25                  | Moderate                | none                      |
| 26                  | Moderate                | none                      |
| 27                  | Moderate                | 18                        |
| 28                  | Moderate                | none                      |
| 29                  | Moderate                | 19, 5                     |
| 30                  | Moderate                | none                      |
| 31                  | Moderate                | 20, 21, 22                |
| 32                  | Moderate                | 4, 10, 19                 |
| 33                  | Moderate                | none                      |
| 34                  | Moderate                | none                      |
| 35                  | Moderate                | 19                        |
| 36                  | Moderate                | 4                         |
| 37                  | Moderate                | 10, 1, 23                 |
| 38                  | Moderate                | none                      |
| 39                  | Moderate                | none                      |
| 40                  | Moderate                | none                      |
| 41                  | Moderate                | 19, 20                    |

---

|    |          |              |
|----|----------|--------------|
| 42 | Moderate | 4            |
| 43 | Moderate | 24           |
| 44 | Moderate | 25           |
| 45 | Moderate | none         |
| 46 | Moderate | none         |
| 47 | Moderate | 3, 4, 10, 26 |
| 48 | Moderate | none         |
| 49 | Moderate | none         |
| 50 | Moderate | none         |
| 51 | Moderate | 27           |
| 52 | Moderate | 4, 28        |
| 53 | Moderate | none         |
| 54 | Moderate | none         |
| 55 | Moderate | 4, 10, 29    |
| 56 | Moderate | none         |
| 57 | Moderate | none         |
| 58 | Moderate | 4,30         |
| 59 | Moderate | none         |
| 60 | Moderate | none         |
| 61 | Moderate | none         |
| 62 | Moderate | none         |
| 63 | Moderate | none         |
| 64 | Moderate | 31, 32       |
| 65 | Moderate | 10           |
| 66 | Moderate | none         |
| 67 | Moderate | none         |
| 68 | Moderate | 33           |
| 69 | Moderate | none         |
| 70 | Moderate | 1            |
| 71 | Moderate | none         |
| 72 | Moderate | none         |
| 73 | Moderate | none         |
| 74 | Moderate | 1            |
| 75 | Moderate | none         |
| 76 | Moderate | none         |
| 77 | Moderate | none         |
| 78 | Moderate | none         |
| 79 | Mild     | none         |
| 80 | Mild     | none         |
| 81 | Mild     | none         |
| 82 | Mild     | none         |
| 83 | Mild     | 4,34         |
| 84 | Mild     | 4            |
| 85 | Mild     | none         |

---

|    |      |      |
|----|------|------|
| 86 | Mild | none |
| 87 | Mild | none |

Underlying illness: 1. Hepatitis B; 2. Postoperative hepatocellular carcinoma; 3. Respiratory failure; 4. Hypertension; 5. Cerebral infarction; 6. Upper gastrointestinal bleeding; 7. Coronary heart disease; 8. Cholecystectomy; 9. Benign prostatic hyperplasia; 10. Diabetes; 11. 1. Hepatitis B; 2. Postoperative hepatocellular carcinoma; 3. Respiratory failure; 4. Hypertension; 5. Cerebral infarction; 6. Upper gastrointestinal bleeding; 7. Coronary heart disease; 8. Cholecystectomy; 9. Benign prostatic hyperplasia; 10. Diabetes; 11. Rheumatoid Arthritis; 12. Hernia surgery; 13. Lower extremity arterial occlusion; 14. Heart valve disease; 15. Atrial fibrillation; 16. Expansion; 17. Car accident caused multiple soft tissue, intracranial hemorrhage, and improved after conservative; 18. Chronic gastritis; 19. Hyperlipidemia 20. Leukopenia; 21. Anemia; 22. Sinus tachycardia; 23. Fatty Liver; 24. Proteinuria; 25. Hyperthyroidism; 26. Hypoproteinemia; 27. Uremia; 28. Left nephrectomy; 29. Breast cancer; 30. Parkinson; 31. Frozen shoulder; 32. Rheumatism; 33. Nasal drip syndrome; 34. Hyperuricemia.

**Supplementary table 2.** False positive cases diagnosed by the current RBD-based kits.

| Kit type | False-positive cases |        |                   |        |                      |      |
|----------|----------------------|--------|-------------------|--------|----------------------|------|
|          | Healthy cases        |        | Interfering cases |        | Once suspected cases |      |
|          | %                    | n      | %                 | n      | %                    | n    |
| IgA kit  | 0.61                 | 2/330  | 4.35              | 6/138  | 6.67                 | 1/15 |
| IgM kit  | 5.45                 | 18/330 | 9.42              | 13/138 | 40.0                 | 6/15 |
| IgG kit  | 0                    | 0/330  | 0.73              | 1/138  | 0                    | 0/15 |

Most of false-positive outcomes in the IgA and IgG tests are from patients who were tested negative for SARS-CoV-2 viral RNA and had other underlying diseases. For example, the four of six “false-positive” samples by the RBD IgA test included two patients who had kidney diseases and high-level self-antibodies, one had liver cirrhosis, and another had breast cancer.

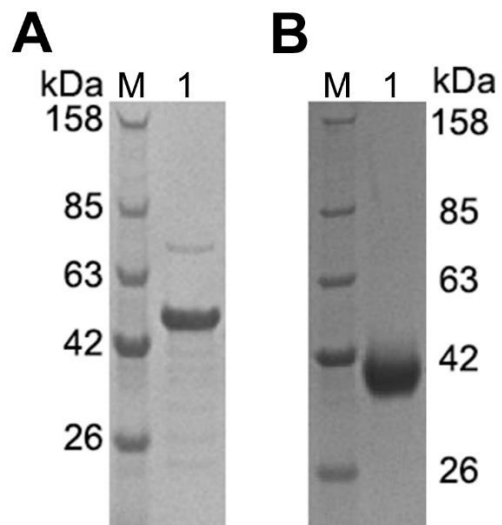

**Supplementary figure 1.** Purification of recombinant SARS-CoV-2 nucleocapsid protein (NP, A) and receptor-binding domain (RBD, B) of the spike protein. After SDS-PAGE separation based on molecular weight (kDa) together with protein size markers (M), the proteins were stained with Coomassie Blue. A is staining of purified NP (predicted molecular mass of 49.5 kDa). B is staining of purified RBD (predicted molecular mass of 30.3 kDa).

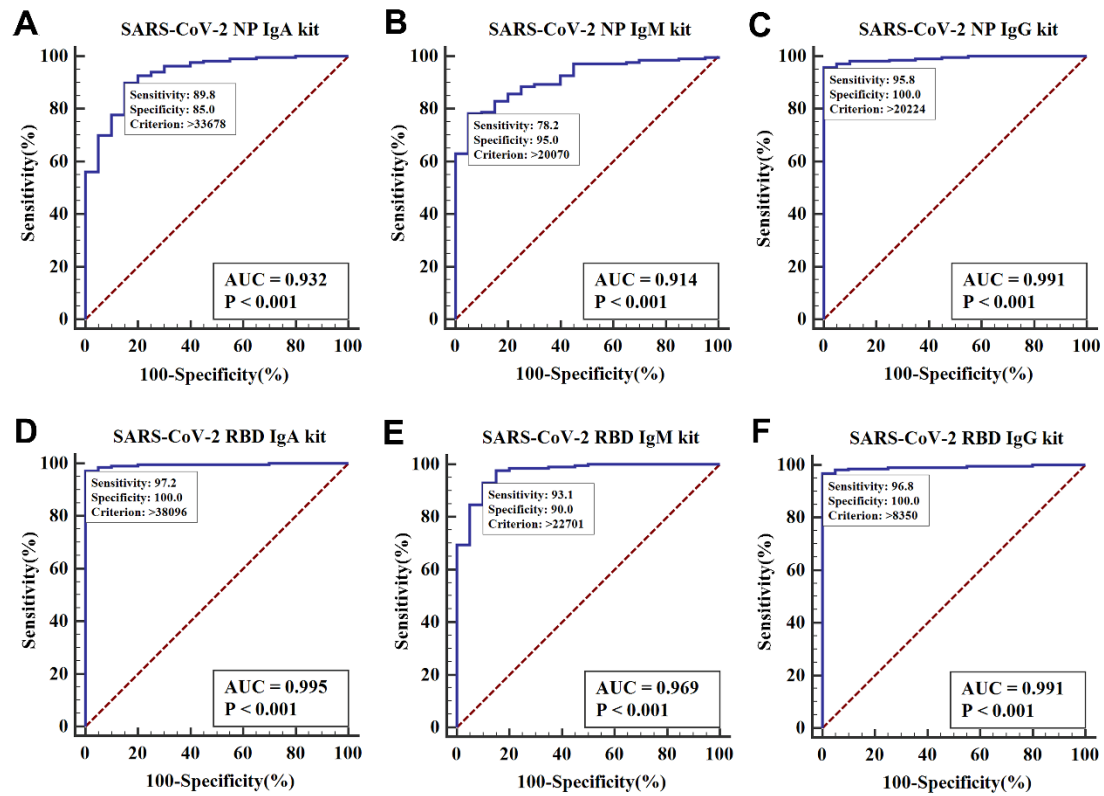

**Supplementary figure 2.** The receiver operating characteristic (ROC) curve analysis for SARS-CoV-2 diagnosis by NP-specific IgA, IgM, and IgG kit (A, B, and C, respectively), and RBD-specific IgA, IgM, and IgG kit (D, E, and F), respectively. Twenty sera of 20 SARS-CoV-2 negative patients and 216 sera of SARS-CoV-2 infected patients were used. AUC, area under the curve of ROC.

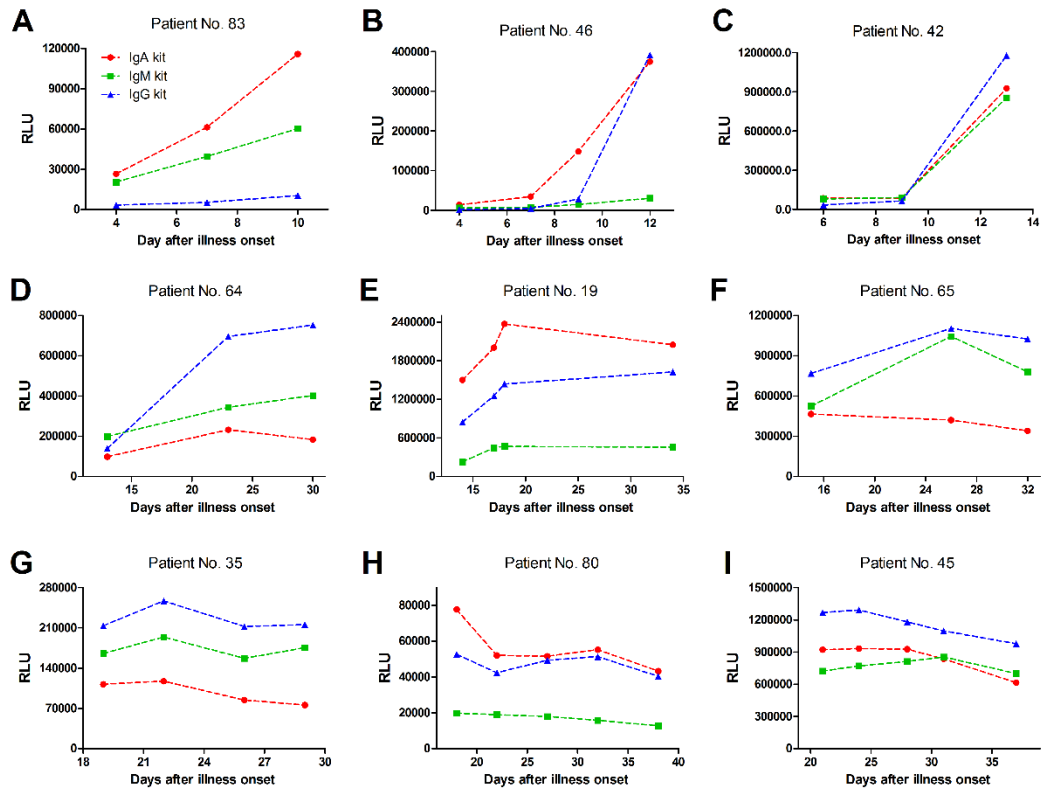

**Supplementary figure 3.** Representative testing results of sera collected at consecutive time points after illness onset by RBD-based kits (IgA, red; IgM green; and IgG, blue). A-I were testing results of sera from nine individual COVID-19 patients.

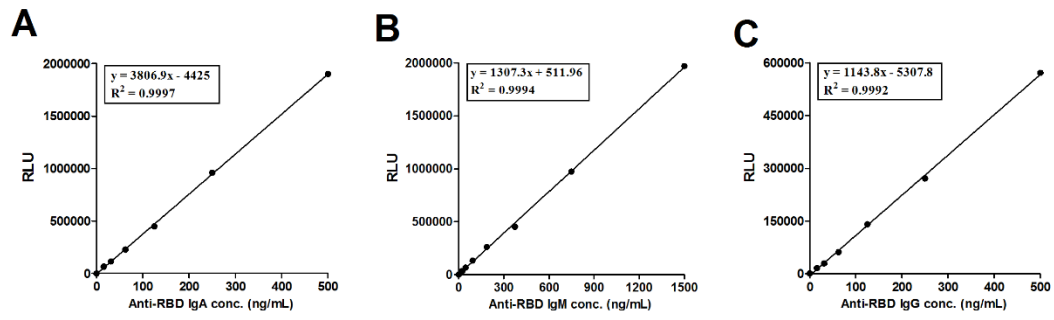

**Supplementary figure 4.** Standard curves for antibody concentration vs. RLU. Standard curves were constructed based on immunoassay of 7-8 concentrations of anti-RBD IgA (A) or IgM (B) or IgG (C) antibodies purified from a serum pool of SARS-CoV-2 infected patients.



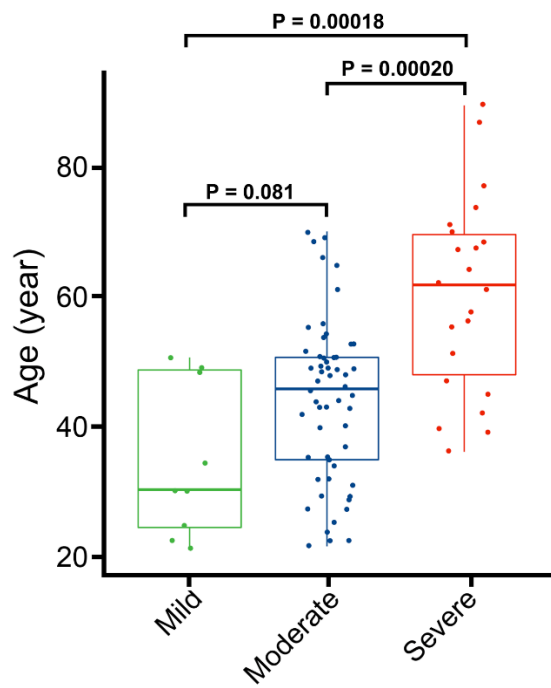

**Supplementary figure 5.** Correlation between patient age and disease severity. Mild: 9; moderate: 56, and severe: 22 patients.
